# Supplementary material for: A highly sensitive and selective biosensing strategy for the detection of Pb2+ ions based on GR-5 DNAzyme functionalized AuNPs
Source: Royal Society of Chemistry journal article supplement (doi:10.1039/c3nj00328k), 2013-01-01

**Electronic Supplementary Information (ESI)**  
**for**  
**A highly sensitive and selective biosensing strategy for the**  
**detection of Pb<sup>2+</sup> ion based on GR-5 DNzyme**  
**functionalized AuNPs**

Hai-Bo Wang,\*<sup>a b</sup> Lan Wang,<sup>a</sup> Ke-Jing Huang,<sup>a</sup> Shu-Ping Xu,<sup>a</sup> Hong-Qi  
Wang,\*<sup>c</sup> Ling-Ling Wang,<sup>a</sup> Yan-Ming Liu<sup>a</sup>

<sup>a</sup> *College of Chemistry and Chemical Engineering, Xinyang Normal University,  
Xinyang 464000, PR China*

<sup>b</sup> *State Key Laboratory of Chemo/biosensing and Chemometrics, College of Chemistry  
and Chemical Engineering, Hunan University, Changsha, 410082, PR China*

<sup>c</sup> *Research Center of Agricultural Quality Standards and Testing Techniques, Henan  
Academy of Agricultural Sciences, Zhengzhou 450002, PR China*

**Fig. S1.** Fluorescence emission spectra of DNAzyme-modified AuNPs under different conditions: (a) DNAzyme-modified AuNPs; (b) (a) stored at 4 °C for one week; (c) (b) treated with 2 mM KCN.

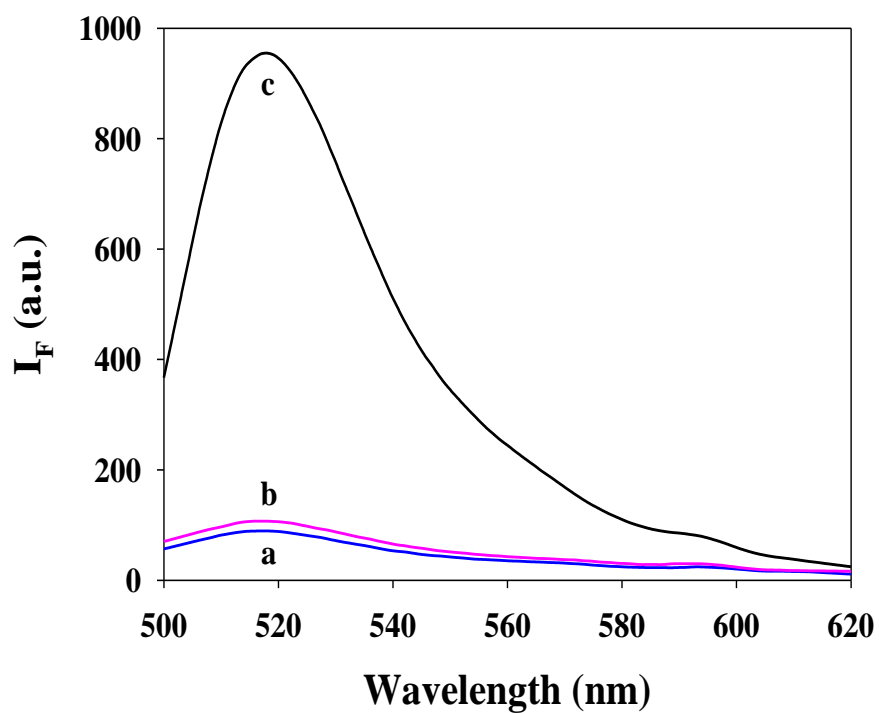

**Fig. S2.** The photograph of the DNAzyme-modified AuNPs stored at 4 °C for 0 h (a) and one week (b). Excellent solubility and stability were observed for DNAzyme-modified AuNPs in 10 mM phosphate buffered saline.

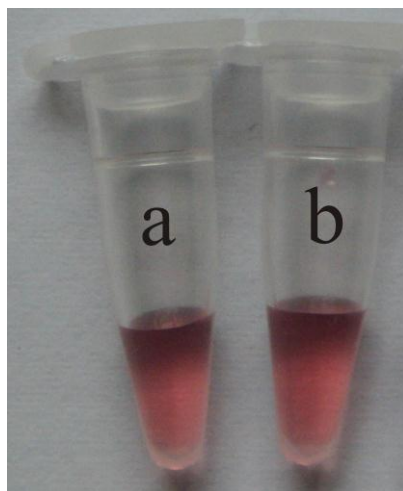

Supplement: c3nj00328k.pdf [file c3nj00328k.pdf]
